# Supplementary material
Source: publisher site journal article supplement (https://www.dovepress.com/article/600653)
Supplement: Supplementary file 1 [file 600653_Supplementary.docx]

## Supplementary Results 1

### Kaplan–Meier Time-to-Event Analysis

Among the 1,022 patients included, 709 (69.4%) achieved vaginal delivery, while 313 (30.6%) were censored due to the cesarean deliveries. The median time to vaginal delivery was 14.9 h (95% CI: 14.4–15.6) in Group 4, 15.5 h (95% CI: 15.0–16.4) in Group 1, 18.1 h (95% CI: 17.1–18.6) in Group 2, and 19.4 h (95% CI: 18.6–23.5) in Group 3. Pairwise log-rank tests showed that most intergroup differences were statistically significant (p < 0.001), whereas the comparison between Groups 1 and 4 was not significant (p = 0.081). This finding suggests that although misoprostol (Group 4) was associated with the numerically shortest time to vaginal delivery, its advantage over DBC alone (Group 1) should be interpreted with caution.

Table S1. Kaplan–Meier survival analysis of time to vaginal delivery across study groups

| **Kaplan-Meier Time-to-Event Analysis** | **Group 1** | **Group 2** | **Group 3** | **Group 4** | **p-value** |
| --- | --- | --- | --- | --- | --- |
| **Number of patients** | 234 | 246 | 238 | 304 | **<0.001*** |
| **Vaginal deliveries, n** | 167 | 169 | 147 | 226 |
| **Cesarean sections, n (censored)** | 67 | 77 | 91 | 78 |
| **Median time to vaginal delivery (hours)** | 15.5 | 18.1 | 19.4 | 14.9 |
| **95% CI** | 15.0-16.4 | 17.1-18.6 | 18.6-23.5 | 14.4-15.6 |
| **Pairwise comparisons (p-values)** |  |  |  |  |  |
| **vs Group 1** | - | <0.001 | <0.001 | 0.081 |  |
| **vs Group 2** | <0.001 | - | <0.001 | <0.001 |  |
| **vs Group 3** | <0.001 | <0.001 | - | <0.001 |  |

CI: Confidence interval. *Log-rank test (χ²=94.7, df=3). All pairwise comparisons were performed using the log-rank test. Group 4 demonstrated the shortest median time to vaginal delivery (14.9 h), whereas Group 3 had the longest (19.4 h).

## Supplementary Results 2

### Predictors of Time to Active Labor

Multivariable linear regression identified the method of induction as the strongest determinant of the interval between catheter insertion and active labor (**Table S2**). Compared with DBC alone, DBC + misoprostol significantly shortened this transition (β = –0.08, 95% CI: –0.15 to –0.02; p = 0.022), whereas DBC + dinoprostone was associated with a longer treatment duration. Higher initial Bishop scores independently predicted shorter times to active labor. Maternal age and BMI were associated in separate models, but not when evaluated simultaneously due to collinearity. Nulliparity was not a significant predictor in any of the adjusted models.

Table S2. Multivariate linear regression analysis of predictors of time to active labor

| **Variables** | **Univariable Analysis** | | **Multivariable Model 1** | | **Multivariable Model 2** | |
| --- | --- | --- | --- | --- | --- | --- |
| **β (95% CI)** | **p-value** | **β (95% CI)** | **p-value** | **β (95% CI)** | **p-value** |
| **Method of induction** |  |  |  |  |  |  |
| Other methods | Reference | - | Reference | - | Reference | - |
| DBC alone | -0.08 (-0.15- -0.02) | **0.011** | -0.08 (-0.15- -0.02) | **0.022** | -0.07 (-0.14- -0.01) | **0.041** |
| **Bishop score upon admission** |  |  |  |  |  |  |
| ≥3 | Reference | - | Reference | - | Reference | - |
| <3 | 0.63 (0.39- 0.67) | **<0.001** | 0.11 (-0.01- 0.23) | 0.084 | 0.11 (-0.01- 0.22) | 0.063 |
| **Gestational age at delivery** |  |  |  |  |  |  |
| Late term (41-<42 weeks) | Reference | - | Reference | - | Reference | - |
| Post-term (≥42 weeks) | -0.02 (-0.09- 0.04) | 0.456 | 0.02 (-0.06- 0.09) | 0.684 | 0.03 (-0.05- 0.10) | 0.490 |
| **Time from PROM to IOL** |  |  |  |  |  |  |
| ≤12 hours | Reference | - | Reference | - | Reference | - |
| >12 hours | -0.23 (-0.33- -0.12) | **<0.001** | -0.02 (-0.10- 0.06) | 0.664 | -0.02 (-0.11- 0.08) | 0.695 |
| **Nulliparity** |  |  |  |  |  |  |
| No | Reference | - | Reference | - | Reference | - |
| Yes | -0.39 (-0.44- -0.34) | **<0.001** | 0.05 (-0.05- 0.15) | 0.315 | 0.06 (-0.05- 0.18) | 0.227 |
| **Maternal BMI** *(kg/m²)* | 0.08 (0.07- 0.08) | **<0.001** | 0.07 (0.06- 0.08) | **<0.001** | - | - |
| **Maternal age** *(years)* | 0.04 (0.04- 0.05) | **<0.001** | - | - | 0.02 (0.01- 0.03) | **<0.001** |
| **Amniotic fluid index** |  |  |  |  |  |  |
| Oligohydramnios (<5 cm) | Reference | - | Reference | - | Reference | - |
| Polyhydramnios (>25 cm) | -0.03 (-0.15- 0.09) | 0.599 | -0.01 (-0.10- 0.09) | 0.947 | -0.02 (-0.11- 0.08) | 0.772 |
| **Estimated fetal weight** *(per 100g)* | 0.01 (0.01- 0.02) | **0.027** | 0.01 (0.01- 0.02) | 0.417 | 0.01 (0.01- 0.02) | 0.295 |

**β:** regression coefficient; CI: confidence interval; DBC: double-balloon catheter; PROM: premature rupture of membranes; IOL: induction of labor; BMI: body mass index; AFI: amniotic fluid index. The dependent variable was the **log-transformed time** from catheter insertion to the onset of active labor. **Model 1** included BMI but excluded maternal age; **Model 2** included maternal age but excluded BMI. **Model fit:** Model 1 (R² = 0.638, adjusted R² = 0.632, F = 107, p < 0.001); Model 2 (R² = 0.552, adjusted R² = 0.544, F = 67.3, p < 0.001). The Kolmogorov–Smirnov test indicated adequate normality for Models 1 (p = 0.112) and 2 (p = 0.005). **Reference categories were as follows:** Bishop score ≥3; late-term pregnancy (41–<42 weeks); time from PROM to IOL ≤12 h; multiparity; and oligohydramnios (AFI <5 cm). **Bold p-values** indicate statistical significance (p ≤ 0.05).

## ****Supplementary Results 3****

### ****Predictors of Oxytocin Use****

Multivariable logistic regression analysis identified nulliparity, higher maternal BMI, and polyhydramnios as independent predictors of oxytocin requirements. Nulliparous women had a nearly sixfold increased risk of oxytocin use (OR: 5.95, 95% CI 4.26–8.31; p<0.001), and each unit increase in BMI was associated with an 8% higher likelihood of oxytocin use (OR: 1.08, 95% CI 1.04–1.12; p<0.001). In contrast, polyhydramnios reduced the need for oxytocin (OR: 0.49, 95% CI: 0.25–0.96; p = 0.039). Notably, although polyhydramnios emerged as an independent predictor of oxytocin use, it was not a predictor of cesarean delivery, underscoring the importance of distinguishing outcomes to avoid misinterpretation. This association should be regarded as hypothesis-generating, as the biological mechanism remains uncertain and requires confirmation in larger prospective studies with standardized definitions. (**Table S3**).

Table S3. Multivariable logistic regression analysis of the predictors of oxytocin usage during labor

| **Variables** | **Univariable Analysis** | | **Multivariable Model** | |
| --- | --- | --- | --- | --- |
| **OR (95% CI)** | **p-value** | **OR (95% CI)** | **p-value** |
| **Method of induction** |  |  |  |  |
| Other methods | Reference | - | - | - |
| DBC alone | 1.04 (0.64, 1.66) | 0.887 | - | - |
| **Bishop score upon admission** |  |  |  |  |
| ≥3 | Reference | - | - | - |
| <3 | 0.78 (0.48, 1.26) | 0.319 | - | - |
| **Gestational age at delivery** |  |  |  |  |
| Late term (41-<42 weeks) | Reference | - | Reference | - |
| Post-term (≥42 weeks) | 0.63 (0.37, 1.05) | 0.081 | 0.75 (0.54, 1.04) | 0.086 |
| **Time from PROM to IOL** |  |  |  |  |
| ≤12 hours | Reference | - | - | - |
| >12 hours | 1.02 (0.64, 1.61) | 0.925 | - | - |
| **Nulliparity** |  |  |  |  |
| No | Reference | - | Reference | - |
| Yes | 6.32 (3.96, 10.37) | **<0.001** | 5.95 (4.26, 8.31) | **<0.001** |
| **Maternal BMI** *(kg/m²)* | 1.01 (0.97, 1.05) | 0.716 | 1.08 (1.04, 1.12) | **<0.001** |
| **Maternal age** *(years)* | 0.89 (0.84, 0.93) | **<0.001** | - | - |
| **Amniotic fluid index** |  |  |  |  |
| Oligohydramnios (<5 cm) | Reference | - | Reference | - |
| Polyhydramnios (>25 cm) | 0.63 (0.33, 1.19) | 0.157 | 0.49 (0.25, 0.96) | **0.039** |
| **Estimated fetal weight** *(per 1000g)* | 1.01 (1.00, 1.01) | 0.494 | - | - |

OR, odds ratio; CI, confidence interval; DBC, double-balloon catheter; PROM, premature rupture of membranes; IOL, induction of labor; BMI, body mass index; AFI, amniotic fluid index. The dependent variable was oxytocin augmentation during labor (**yes/no**). The multivariable model was constructed using backward stepwise (**likelihood ratio**) selection, retaining only the significant and clinically relevant predictors. The model classification accuracy was 67.8%, and the Hosmer–Lemeshow test indicated good fit. **Reference categories were as follows:** Bishop score ≥3; late-term pregnancy (41–<42 weeks); time from PROM to IOL ≤12 h; multiparity; and oligohydramnios (AFI <5 cm). **Bold p-values**indicate statistical significance (p ≤ 0.05).
